# Supplementary material for: Fluctuating temperatures alter environmental pathogen transmission in a Daphnia–pathogen system
Source: PubMed Central journal article supplement (PMC6093173; doi:10.1002/ece3.2539), 2016-10-17
Supplement: ECE3-6-7931-s001.pdf [file ECE3-6-7931-s001.pdf]

1 **Supplementary Material:**  
2 Fluctuating temperatures alter environmental pathogen  
3 transmission in a *Daphnia*-pathogen system

4 Tad Dallas John M. Drake

5 **Host survival as a function of temperature variability**

6 Host survival was influenced by temperature variability treatment (Figure S1), but only for  
7 the highest variability treatment (see main text Figure 1). The survival curves for the two  
8 highest variability treatments (2 hour and 4 hour treatments) appeared to diverge from the  
9 two lower variability treatments (control and 1 hour treatment) between days 0 and 20, but  
10 individuals surviving after this period tended to have similar decay trajectories. The exception  
11 is the highest variability treatment (4 hour treatment), which decayed more sharply than the  
12 other treatments.

13 **Sensitivity of infection day cutoff**

14 We believed that we could accurately estimate host infection status five days after host indi-  
15 viduals were exposed to pathogen spores. There was only one individual that was recorded as  
16 infected seven days after pathogen exposure. We relax the assumption that we could detect  
17 these early-stage infections, and instead consider a cutoff of 10 days post-inoculation. There  
18 is no change in the qualitative results presented in the main text (Figure S2 relative to main  
19 text Figure 1). The logistic regression results are also similar, in which temperature variability,  
20 specifically the 2 hour (logistic regression;  $\beta_2 = -0.79$ ,  $z = -1.93$ ,  $p = 0.053$ ) and 4 hour ( $\beta_4 =$   
21  $-0.65$ ,  $z = -1.62$ ,  $p = 0.104$ ) treatments, with a marginal reduction in the probability of infection  
22 compared to constant temperature controls. The effect is not as strong as when we consider  
23 the full dataset, but this is likely not a result of the lack of effect, but simply the loss of data  
24 (34% of individuals died before day 10).

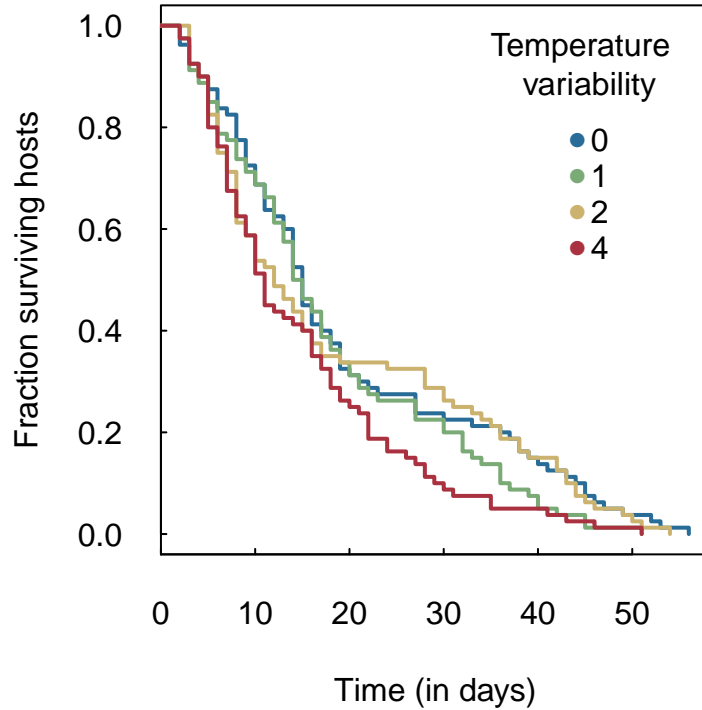

Figure S1: Temperature variability influenced the survival of individuals, but only when comparing the control treatment (0 hour treatment; blue) to the highest variability treatment (4 hour treatment; red).

25 **Pairwise comparison of host filtering rate differences between temperature**  
 26 **variability treatments**

27 All temperature variability treatments (1, 2, and 4 hour exposure treatments) reduced host  
 28 filtering rate significantly compared to constant conditions, but did not differ from one another  
 29 (Table S1). This may mean that any amount of temperature variability greater than our  
 30 lowest treatment (1 hour exposure to low and high temperatures) may result in the same host  
 31 response in terms of filtering rate, suggesting that the degree of temperature variation does not  
 32 additively reduce host filtering rate. While it may be unlikely that a *Daphnia* individual will  
 33 experience these quick changes in conditions, thermal variability as a result vertical position in  
 34 the water column or rainfall inputs may be similar in magnitude or timing to our experimental  
 35 temperature variability manipulations.

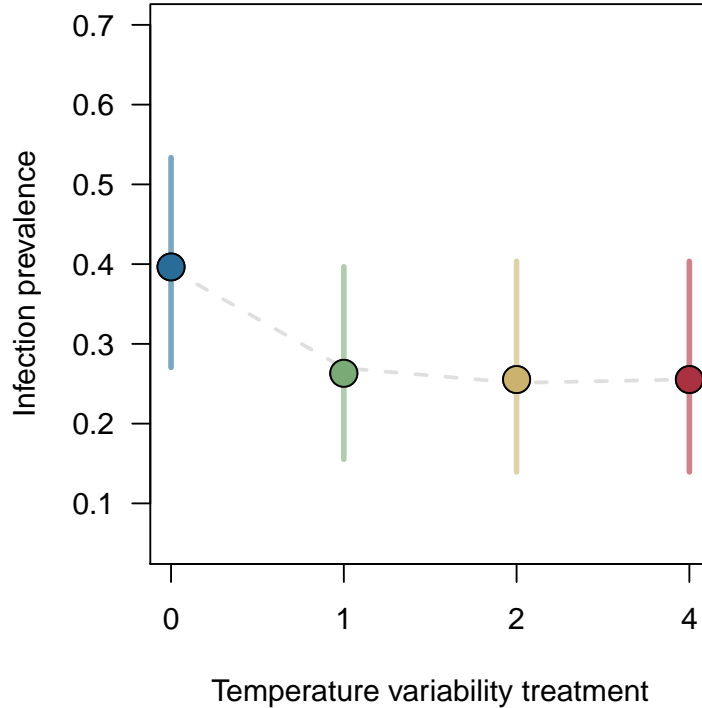

Figure S2: Infection prevalence was reduced with increasing temperature variability. Plotted points correspond to the fraction of individuals in each treatment that became infected, and error bars are binomial confidence intervals. Host mortality prior to day 10 of the experiment was not considered in this analysis.

### 36 **Filtering rate estimation**

37 Here, we provide more detail about how we estimated host filtering rates, and compare our re-  
 38 sults to other filtering rate studies. Filtering rates were estimated with fluorescent microspheres  
 39 (20-27  $\mu\text{m}$  diameter, Cospheric LLC, Santa Barbara, CA). We exposed hosts to a known concen-  
 40 tration of microspheres (1000 microspheres  $\text{ml}^{-1}$ ) for 2 minutes. After this time, we euthanized  
 41 the host with 1 ml of carbonated water, and immediately quantified the number of spores in  
 42 both the host thoracic appendages and gut. Potentially due to the size or palatability of the  
 43 microspheres, there were a greater number of microspheres entrained in the filtering appendages  
 44 than in the gut of the *Daphnia* hosts. We calculated filtering rate by estimating the rate at  
 45 which they were ingested based on microsphere counts from the gut and thoracic appendages  
 46 separately, and both added together. The main text reports the results of including micro-  
 47 spheres found in both host gut and thoracic appendages, but we report estimates for filtering

Table S1: Host filtering rates were significantly reduced by temperature variability relative to the control (20 °C) condition (adjusted  $p$ -values are in bold text), but did not differ with increasing variability, based on a Tukey HSD test on differences among treatment means ( $\Delta m$  values). Pairwise comparisons between host filtering rate differences among constant (12,20,28) and variable (1,2, or 4 hour) temperature treatments suggest temperature variability reduces host filtering rate compared to constant 20 °C conditions, but do not differ from hosts held at constant low (12 °C) or high (28 °C) temperatures. Further, host filtering rates were different between constant low (12 °C) and control (20 °C) temperatures.

| Trt 1  | Trt 2  | $\Delta m$ | 95% CI           | $p_{adj}$        |              |
|--------|--------|------------|------------------|------------------|--------------|
| 1 hour | 12     | 0.003      | [-0.109 , 0.115] | 1.000            |              |
| 2 hour | 12     | -0.013     | [-0.123 , 0.096] | 0.999            |              |
| 4 hour | 12     | 0.018      | [-0.097 , 0.133] | 0.997            |              |
| 1 hour | 20     | -0.12      | [-0.20 , -0.03]  | <b>0.006</b>     |              |
| 2 hour | 20     | -0.13      | [-0.22 , -0.05]  | <b>0.001</b>     |              |
| 4 hour | 20     | -0.10      | [-0.19 , -0.01]  | <b>0.030</b>     |              |
| 1 hour | 28     | -0.029     | [-0.135 , 0.076] | 0.966            |              |
| 2 hour | 28     | -0.046     | [-0.148 , 0.057] | 0.787            |              |
| 4 hour | 28     | -0.014     | [-0.123 , 0.094] | 0.999            |              |
| 2 hour | 1 hour | -0.02      | [-0.11 , 0.08]   | 0.965            |              |
| 4 hour | 1 hour | 0.01       | [-0.08 , 0.11]   | 0.978            |              |
| 4 hour | 2 hour | 0.03       | [-0.07 , 0.13]   | 0.829            |              |
|        | 20     | 12         | 0.118            | [ 0.012 , 0.225] | <b>0.021</b> |
|        | 28     | 12         | 0.032            | [-0.087 , 0.152] | 0.968        |
|        | 28     | 20         | -0.086           | [-0.186 , 0.014] | 0.132        |

48 rate for gut and thoracic appendages in Figure S3.

49 While our estimates of filtering rate were smaller than some published estimates from *Daph-*  
50 *nia* fed yeast [1], they were comparable to estimates of filtering rate determined from feeding  
51 live algae [2, 3], or fluorescent microspheres [4]. There are a number of reasons for observed  
52 differences. First, *Daphnia* hosts were fed a suspension of freeze-dried *Spirulina*, a blue-green  
53 alga and substandard resource. Second, we used a two minute incubation time to ensure that no  
54 microspheres were able to pass through the host gut. This was an appropriate duration of time

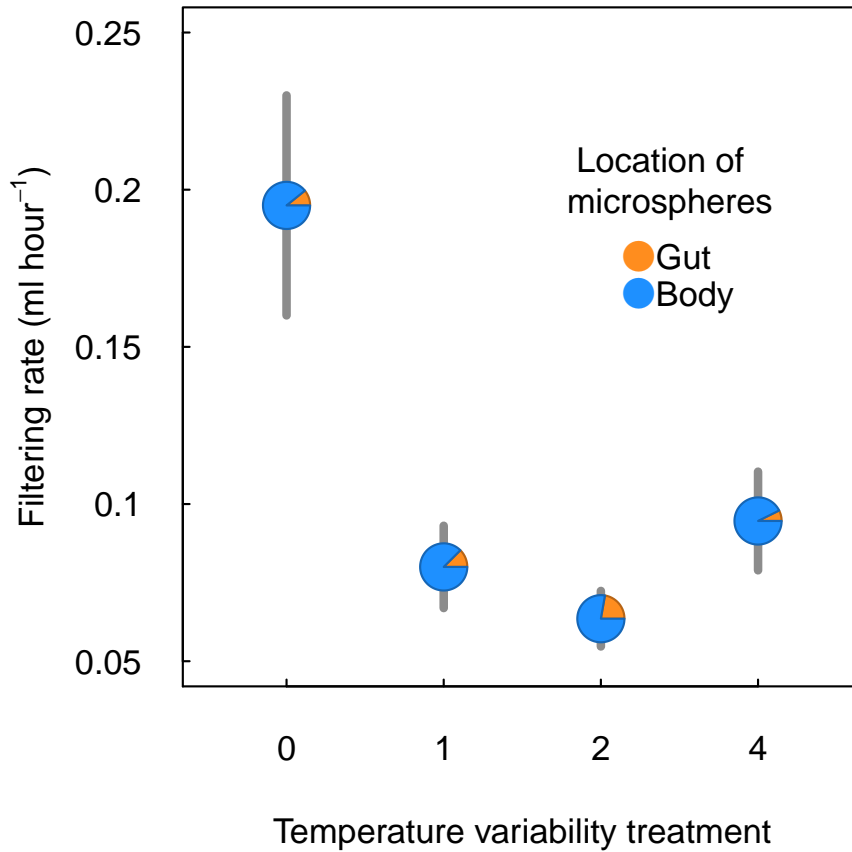

Figure S3: We considered filtering rate to include microspheres found in both the host gut (orange sections) and the thoracic appendages (blue sections; referred to in the legend as “Body”).

55 based on preliminary trials, and the presence of microspheres towards the lower part of the host  
 56 gut observed in experiments. Lastly, individuals used in filtering rate assays were fairly young  
 57 (5-6 days old), and *D. laevis* is a smaller bodied *Daphnia* species (body length of approximately  
 58 1mm). However, it is unlikely that any of these potential biases would disproportionately in-  
 59 fluence one treatment over another, leaving comparisons between treatments valid. Further,  
 60 filtering rates were not substantially different from other studies using microspheres [4].

## 61 **References**

- 62 [1] Burns, C.W. (1969) Relation between filtering rate, temperature, and body size in four  
63 species of *Daphnia*. *Limnology and Oceanography*, **14**, 693–700.
- 64 [2] Chow-Fraser, P. & Knoechel, R. (1985) Factors regulating in situ filtering rates of Cladocera.  
65 *Canadian Journal of Fisheries and Aquatic Sciences*, **42**, 567–576.
- 66 [3] DeMott, W.R. (1982) Feeding selectivities and relative ingestion rates of *Daphnia* and  
67 *Bosmina*. *Limnology and Oceanography*, **27**, 518–527.
- 68 [4] Wagner, A. & Kamjunke, N. (2001) Reduction of the filtration rate of *Daphnia galeata* by  
69 dissolved photosynthetic products of edible phytoplankton. *Hydrobiologia*, **442**, 165–176.
